# Supplementary material for: Practical Pharmacist-Led Interventions to Improve Antimicrobial Stewardship in Ghana, Tanzania, Uganda and Zambia
Source: MDPI journal article supplement (doi:10.3390/pharmacy9030124), 2021-07-08
Supplement: s1 [file s1]

GHANA POLICE HOSPITAL

DEPARTMENT OF OBSTETRICS & GYNAECOLOGY

CAESAREAN SECTION (C/S) DRUG LIST

DATE & TIME.....

NAME OF PATIENT..... AGE.....

SERVICE NO..... RANK..... RELATIONSHIP.....

|     |                                   |                   |  |
|-----|-----------------------------------|-------------------|--|
| 1.  | RINGER'S LACTATE IVF              | 2000ml            |  |
| 2.  | NORMAL SALINE IVF                 | 1500ml            |  |
| 3.  | DEXTROSE SALINE IVF               | 1500ml            |  |
| 4.  | AMOKSICLAV IV                     | 1.2g BD X 24HRS   |  |
| 5.  | METRONIDAZOLE IV                  | 500mg TDS X 24HRS |  |
| 6.  | PARACETAMOL IV                    | 1g TDS X 24HRS    |  |
| 7.  | OXYTOCIN IV/IM                    | 40 UNITS          |  |
| 8.  | MISOPROSTOL (CYTOTEC)             | 1000mcg           |  |
| 9.  | DICLOFENAC SUPPOSITORY            | 100mg BD X 5DAYS  |  |
| 10. | VITAMIN K INJECTION               | 1mg STAT          |  |
| 11. | AMOKSICLAV TABS                   | 625mg BD X 5DAYS  |  |
| 12. | METRONIDAZOLE TABS                | 400mg TDS X 5DAYS |  |
| 13. | CETIRIZINE TABS                   | 10mg OD X 5DAYS   |  |
| 14. | DISPOSABLE GLOVES                 | 1 BOX             |  |
| 15. | URETHRAL CATHETER SIZE 16         | 1                 |  |
| 16. | VIOPLEX- T SPRAY POWDER           | 1                 |  |
| 17. | ONETOUCH SELECT GLUCOMETER STRIPS | 1 PACK            |  |
| 18. |                                   |                   |  |
| 19. |                                   |                   |  |
