# Supplementary material for: Practical Pharmacist-Led Interventions to Improve Antimicrobial Stewardship in Ghana, Tanzania, Uganda and Zambia
Source: MDPI journal article supplement (doi:10.3390/pharmacy9030124), 2021-07-08
Supplement: s1 [file s1]

## Workplan based on the baseline GLOBAL-PPS study results Case Study at Ghana Police Hospital

[illegible]

|  |  |  |  |  |                                                                                                                                                                                                       |
|--|--|--|--|--|-------------------------------------------------------------------------------------------------------------------------------------------------------------------------------------------------------|
|  |  |  |  |  | <p>hospital</p> <ul style="list-style-type: none"><li>• Education / awareness session</li></ul> <p>Can guideline development be done in partnership with any other institution to share resources</p> |
|--|--|--|--|--|-------------------------------------------------------------------------------------------------------------------------------------------------------------------------------------------------------|
