# Supplementary material for: Practical Pharmacist-Led Interventions to Improve Antimicrobial Stewardship in Ghana, Tanzania, Uganda and Zambia
Source: MDPI journal article supplement (doi:10.3390/pharmacy9030124), 2021-07-08
Supplement: s1 [file s1]

## **GUIDELINE FOR ANTIMICROBIAL THERAPY IN WOUNDS**

### **1. Clean wound**

- (i) Surgically incised wound under aseptic condition without pre-existing infection or opening into any hollow viscus.

Treatment: No Antibiotics Needed

### **2. Clean Contaminated Wound**

- (i) Surgically incised wound under aseptic conditions into a hollow viscus without spillage.
- (ii) Wounds of any other kind by a clean implement/instrument/tool seen in less than 6 hours without obvious contamination by foreign material.

Treatment: 1. Inj Amoxiclav 1.2g start

OR

2. Inj. Ceftriazone 1g Start

### **3. Contaminated Wound**

- (i) Surgically incised wound under aseptic condition into a hollow viscus with spillage of contents.
- (ii) Any other wound of any kind with obvious contamination by foreign/external material.
- (iii) Clean contaminated wound expose for more than 6 hours.

Treatment: (i) IV Amoxiclav 1.2g 8hourly X 72hrs

+

(ii) IV Flagyl 500mg 8hourly X 72hrs

+

(iii) IV \*Gentamicin 80mg 8 hours X 72 hours

**OR**

(iv) IV Ceftriazone 1g daily X 72 hours

+

(v) IV Flagyl 500mg 8hours X 72 hours

**OR**

(vi) IV Clindamycin 300MG 8 hours X 72 hours

+

(vii) IV \*Gentamycin 80 mg 8 hours X 72 hours

*Oral*

(i) Tab Amosiklav 62 mg 12 hours X 5days

+

Tab Flagyl 500mg 8 hours X 5days

**OR**

(ii) Cap Clindamycin 300mg 8 hourly X 5days

+

Tab Ciprofloxacin 500mg 12 hourly X 5days

#### **4. Dirty Wound**

(i) Surgically incised wound with obvious pus collection or faecal contamination.

(ii) Other wounds with pus or abscess formation or cross contamination with external material e.g. soil.

(iii) Wet gangrene

*Treatment: Admit Patient*

(i) IV Amosiklav 1.2g 8 hourly X 72 hours

+

(ii) IV \*Gentamicin 80mg 8 hourly X 72 hours

+

(iii) IV Flagyl 500mg 8 hourly X 72 hours

**OR**

IV Ceftriazone 2g daily X 72 hours

+

IV Flagyl 500mg 8 hourly X 72 hours

OR

IV Clindamycin 300mg 8 hourly X 72 hours

+

IV Ceftriazone 2g daily X 72 hours

*(Treatment beyond 72 hours should be tailored to culture and sensitive result if available after 72 hours)*

*\* Ensure normal urine output/or normal BUE&Cr before commencing use.*
