# Supplementary material for: Practical Pharmacist-Led Interventions to Improve Antimicrobial Stewardship in Ghana, Tanzania, Uganda and Zambia
Source: MDPI journal article supplement (doi:10.3390/pharmacy9030124), 2021-07-08
Supplement: s1 [file s1]

**Draft programme: CwPAMS Project: Kilimanjaro Christian Medical Centre (KCMC) team visit to Northumbria Healthcare NHS Trust (NHCT)\***  
**03/05/2019**

| Friday 3 <sup>rd</sup> May                          | Saturday 4 <sup>th</sup> May                                                                                           | Sunday 5 <sup>th</sup> May                           | Monday 6 <sup>th</sup> May                                                    | Tuesday 7 <sup>th</sup> May                      | Wednesday 8 <sup>th</sup> May                                                     | Thursday 9 <sup>th</sup> May                                                          |
|-----------------------------------------------------|------------------------------------------------------------------------------------------------------------------------|------------------------------------------------------|-------------------------------------------------------------------------------|--------------------------------------------------|-----------------------------------------------------------------------------------|---------------------------------------------------------------------------------------|
| KCMC team depart from JRO airport<br>Flight: QR1354 |                                                                                                                        |                                                      | Bank holiday<br>Monday                                                        | 7:45am collected by BL for transport to Cobalt   | KCMC<br>Microbiologist<br>9:00-13:00<br>(Ward 3)<br>NSECH                         | 8:30 Collected by BL for transport to NTGH                                            |
|                                                     |                                                                                                                        |                                                      | Rest Day:<br>Suggested activity<br>Explore Woodhorn Museum<br>Entry fee £7.00 | Trust induction<br>8:15 – 12:00                  | KCMC<br>Microbiologist<br>13:05- 13:30<br>Transport to NTGH                       | 10:00-11:00<br>All KCMC colleagues to join IPC meeting<br>NTGH IPC office             |
|                                                     | Flight number: BA 1328                                                                                                 | 11:00<br>UK pharmacist to show team around Newcastle |                                                                               | 12:00-12:30<br>Lunch                             | 09:00-09:30<br>KCMC Pharmacists<br>CDiff MDT<br>(Education Centre NTGH Room 10)   | 11:00 -13:00<br>Shadow IPC nurse<br>NTGH                                              |
|                                                     | 16:00<br>Expected arrival into Newcastle airport from London Heathrow<br>Collected by Robert Hope and Brenda Longstaff |                                                      |                                                                               | 12:30 – 15:00<br>Trust induction                 | 10:00-12:00<br>KCMC Pharmacists<br>NTGH Pharmacy<br>Department Tour –             | 14:00-16:00<br>Antibiotic steering group<br>(Seminar room, next to endoscopy)<br>NTGH |
|                                                     | Transport to WGH accommodation                                                                                         |                                                      |                                                                               | 15:30-17:00<br>KCMC<br>Microbiologist            | 13:00-14:00<br>KCMC Pharmacists                                                   | 16:10<br>Return to WGH accommodation<br>collection by RH                              |
|                                                     | Food shop                                                                                                              |                                                      |                                                                               | Bone infection audit<br>Ward 11<br>WGH           | Tour of laboratory<br>NTGH –                                                      | e                                                                                     |
|                                                     |                                                                                                                        |                                                      |                                                                               | 15:30 -17:00<br>Basic sign language class<br>WGH | 14:00 – 16:00<br>Microbiology speciality meeting<br>(Pathology seminar room) NTGH |                                                                                       |

**Draft programme: CwPAMS Project: Kilimanjaro Christian Medical Centre (KCMC) team visit to Northumbria Healthcare NHS Trust (NHCT)\***  
**03/05/2019**

| Friday 10 <sup>th</sup> May                                                                                                                                                                                                                                                                                                                                                                               | Saturday 11 <sup>th</sup> May | Sunday 12 <sup>th</sup> May                                                                                                                                       | Monday 13 <sup>th</sup> May                                                                                                                                                                                                                                                                                            | Tuesday 14 <sup>th</sup> May                                                                                                                                                                                                                                                                                                                                                                                                                                                                    | Wednesday 15 <sup>th</sup> May                                                                                                                                                                                                                                                                                                                                               | Thursday 16 <sup>th</sup> May                                                                                                                                                                                               |
|-----------------------------------------------------------------------------------------------------------------------------------------------------------------------------------------------------------------------------------------------------------------------------------------------------------------------------------------------------------------------------------------------------------|-------------------------------|-------------------------------------------------------------------------------------------------------------------------------------------------------------------|------------------------------------------------------------------------------------------------------------------------------------------------------------------------------------------------------------------------------------------------------------------------------------------------------------------------|-------------------------------------------------------------------------------------------------------------------------------------------------------------------------------------------------------------------------------------------------------------------------------------------------------------------------------------------------------------------------------------------------------------------------------------------------------------------------------------------------|------------------------------------------------------------------------------------------------------------------------------------------------------------------------------------------------------------------------------------------------------------------------------------------------------------------------------------------------------------------------------|-----------------------------------------------------------------------------------------------------------------------------------------------------------------------------------------------------------------------------|
| <p>9:30 – 11:30<br/> KCMC<br/> Microbiologist<br/> KCMC Pharmacists<br/> Bone infection ward rounds<br/> WGH</p> <p>11:00-12:00<br/> KCMC Pharmacists<br/> Lab sensitivity<br/> NTGH</p> <p>Collection of daily living allowance<br/> Cashiers office<br/> NTGH</p> <p>13:00 – 17:00<br/> KCMC<br/> Microbiologist<br/> KCMC Pharmacists<br/> AMR Project Planning<br/> Room 11, Education Centre WGH</p> | TBC                           | <p>Visiting Medical Director<br/> Visiting Microbiologist<br/> Visiting Pharmacists</p> <p>Informal activities and tourist activities with UK nurse Volunteer</p> | <p>8:30-12:30<br/> KCMC<br/> Microbiologist<br/> (Ward 3)<br/> NSECH</p> <p>8:30-12:30<br/> KCMC Pharmacists<br/> NSECH main entrance<br/> Shadow Clinical Pharmacy Service</p> <p>14:00- 16:00<br/> KCMC<br/> Microbiologist<br/> KCMC Pharmacists<br/> Sepsis steering group<br/> (Conference centre)<br/> NSECH</p> | <p>Collected by RH<br/> 9:30 – 11:30<br/> KCMC<br/> Microbiologist<br/> KCMC Pharmacists<br/> Bone infection ward rounds<br/> WGH</p> <p>14:00 -14:30<br/> KCMC Pharmacists<br/> HCI meeting<br/> (Education room)<br/> WGH Room 11</p> <p>15:00 17:00<br/> KCMC Pharmacists<br/> With NTGH Senior Clinical Pharmacists<br/> WGH pharmacy<br/> Clinical Service</p> <p>14:00-16:00<br/> KCMC<br/> Microbiologist<br/> Acute medicine consultant meeting<br/> (Ward 7 ED seminar room) NSECH</p> | <p>Collected by RH<br/> 9:00- 9:30<br/> C Diff MDT<br/> (Education centre)<br/> NTGH</p> <p>9:30-17:00<br/> Day case unit<br/> - Complications<br/> - Infections<br/> WGH</p> <p>13:00 – 14:30<br/> Clinical strategy group<br/> (Conference centre)<br/> Cobalt</p> <p>14:00- 16:00<br/> Emergency<br/> Medicine Operation Board meeting<br/> (Seminar room)<br/> NSECH</p> | <p>KCMC<br/> Microbiologist<br/> KCMC Pharmacists</p> <p>10:00-11:00<br/> Meeting with NTGH<br/> Chief Pharmacist<br/> (Pharmacy)<br/> NTGH</p> <p>13:00 – 16:00<br/> Basic Drug awareness<br/> (Room 6&amp;7)<br/> WGH</p> |

**Draft programme: CwPAMS Project: Kilimanjaro Christian Medical Centre (KCMC) team visit to Northumbria Healthcare NHS Trust (NHCT)\***  
**03/05/2019**

|                                                                                                                                                                                                                                                                                                                                                                                                  |                                                                                                            |                                                                                 |                                                                                                                                                                                                                                                                                                                                                                                                                                                                                                                                 |                                                                                                                                                                                                                                                                                                                                                                                                                                                                                        |                                                                                                                                                                                                                                                                                                                                                                                                                                                                                 |                                                                                                                                                                                                                                                                                                                                                                                                                 |
|--------------------------------------------------------------------------------------------------------------------------------------------------------------------------------------------------------------------------------------------------------------------------------------------------------------------------------------------------------------------------------------------------|------------------------------------------------------------------------------------------------------------|---------------------------------------------------------------------------------|---------------------------------------------------------------------------------------------------------------------------------------------------------------------------------------------------------------------------------------------------------------------------------------------------------------------------------------------------------------------------------------------------------------------------------------------------------------------------------------------------------------------------------|----------------------------------------------------------------------------------------------------------------------------------------------------------------------------------------------------------------------------------------------------------------------------------------------------------------------------------------------------------------------------------------------------------------------------------------------------------------------------------------|---------------------------------------------------------------------------------------------------------------------------------------------------------------------------------------------------------------------------------------------------------------------------------------------------------------------------------------------------------------------------------------------------------------------------------------------------------------------------------|-----------------------------------------------------------------------------------------------------------------------------------------------------------------------------------------------------------------------------------------------------------------------------------------------------------------------------------------------------------------------------------------------------------------|
| <p>Friday 17<sup>th</sup> May</p> <p>KCMC<br/>Microbiologist<br/>KCMC Pharmacists<br/>Pharmacy<br/>University Student<br/>Training –<br/>(WGH Education<br/>Centre)</p> <p>11:00 -12:00<br/>Peter Benedict<br/>Lab sensitivity<br/>NTGH</p> <p>Collection of per<br/>diem daily living<br/>allowance</p> <p>12:00-17:00<br/>Northumbria Flow<br/>Celebration Day<br/>Holiday Inn<br/>Jesmond</p> | <p>Saturday 18<sup>th</sup> May</p> <p>Time :TBC<br/>Afternoon tea at<br/>Alnwick Garden<br/>treehouse</p> | <p>Sunday 19<sup>th</sup> May</p> <p>15:00<br/>Team meal at<br/>Ridley Arms</p> | <p>Monday 20<sup>th</sup> May</p> <p>9:00-10:10<br/>KCMC Medical<br/>Director<br/>Sign business case,<br/>annex 4 and MOU</p> <p>10:30-11:00<br/>KCMC Medical<br/>Director Meeting<br/>with Director of<br/>Nursing<br/>(Comms meeting<br/>room)</p> <p>11:00-11:30<br/>KCMC Medical<br/>Director<br/>Meeting with NTGH<br/>Comms Officer<br/>(Comms meeting<br/>room)</p> <p>9:00-17:00<br/>KCMC<br/>Microbiologist<br/>Ambulatory care<br/>NSECH</p> <p>9:00-17:00<br/>KCMC Pharmacists<br/>NSECH PPS Data<br/>Collection</p> | <p>Tuesday 21<sup>st</sup> May</p> <p>8:30-12:30<br/>KCMC<br/>Microbiologist<br/>with<br/>Infectious Disease<br/>clinic</p> <p>13:30-14:30<br/>KCMC Medical<br/>Director and KCMC<br/>Microbiologist<br/>Lab tour<br/>NTGH</p> <p>KCMC Pharmacists<br/>With NTGH<br/>Pharmacy Clinical<br/>Service<br/>8:30 – 13:00<br/>14:00 – 14:30<br/>HCl meeting</p> <p>NTGH<br/>14:30- 17:00<br/>Medicine<br/>management<br/>committee</p> <p>KCMC Medical<br/>Director Travel to<br/>London</p> | <p>Wednesday 22<sup>nd</sup><br/>May</p> <p>9:00- 9:30<br/>KCMC<br/>Microbiologist<br/>KCMC Pharmacists<br/>C Diff MDT<br/>(Education centre,<br/>NSECH - video<br/>conferenced)</p> <p>Report to<br/>Infection<br/>Prevention Control<br/>09:30 – 12:00<br/>Shadow IPC nurse<br/>NSECH</p> <p>14:00 – 17:00<br/>Regional<br/>antimicrobial<br/>pharmacist Group</p> <p>Visiting Medical<br/>Director<br/>THET Innovation<br/>steering group<br/>Royal society<br/>medicine</p> | <p>Thursday 23<sup>rd</sup> May</p> <p>9:00 12:00<br/>KCMC Pharmacists<br/>Gosport Training &amp;<br/>Findings. NTGH<br/>Pharmacy</p> <p>KCMC Medical<br/>Director Return<br/>from London<br/>12:30 arrival</p> <p>KCMC<br/>Microbiologist</p> <p>9:00-17:00<br/>Shadow IPC nurse<br/>WGH</p> <p>14:30-16:00<br/>KCMC Pharmacists<br/>Meeting with<br/>Pharmacy<br/>Department<br/>Newcastle<br/>University</p> |
|--------------------------------------------------------------------------------------------------------------------------------------------------------------------------------------------------------------------------------------------------------------------------------------------------------------------------------------------------------------------------------------------------|------------------------------------------------------------------------------------------------------------|---------------------------------------------------------------------------------|---------------------------------------------------------------------------------------------------------------------------------------------------------------------------------------------------------------------------------------------------------------------------------------------------------------------------------------------------------------------------------------------------------------------------------------------------------------------------------------------------------------------------------|----------------------------------------------------------------------------------------------------------------------------------------------------------------------------------------------------------------------------------------------------------------------------------------------------------------------------------------------------------------------------------------------------------------------------------------------------------------------------------------|---------------------------------------------------------------------------------------------------------------------------------------------------------------------------------------------------------------------------------------------------------------------------------------------------------------------------------------------------------------------------------------------------------------------------------------------------------------------------------|-----------------------------------------------------------------------------------------------------------------------------------------------------------------------------------------------------------------------------------------------------------------------------------------------------------------------------------------------------------------------------------------------------------------|

**Draft programme: CwPAMS Project: Kilimanjaro Christian Medical Centre (KCMC) team visit to Northumbria Healthcare NHS Trust (NHCT)\***  
**03/05/2019**

|                                                                                                                                                                                                                                                                                                                                         |                               |                             |                             | 16:35 departure                                                                                                                                                                                                                                    |                                                                                                                                                                                                                                         |                                                                                                                                                                  |
|-----------------------------------------------------------------------------------------------------------------------------------------------------------------------------------------------------------------------------------------------------------------------------------------------------------------------------------------|-------------------------------|-----------------------------|-----------------------------|----------------------------------------------------------------------------------------------------------------------------------------------------------------------------------------------------------------------------------------------------|-----------------------------------------------------------------------------------------------------------------------------------------------------------------------------------------------------------------------------------------|------------------------------------------------------------------------------------------------------------------------------------------------------------------|
| Friday 24 <sup>th</sup> May                                                                                                                                                                                                                                                                                                             | Saturday 25 <sup>th</sup> May | Sunday 26 <sup>th</sup> May | Monday 27 <sup>th</sup> May | Tuesday 28 <sup>th</sup> May                                                                                                                                                                                                                       | Wednesday 29 <sup>th</sup> May                                                                                                                                                                                                          | Thursday 30 <sup>th</sup> May                                                                                                                                    |
| <p>10:00-11:00<br/> <b>KCMC Medical Director</b><br/> Meeting with Chief Pharmacist (Pharmacy) NTGH</p> <p><b>KCMC Medical Director</b><br/> <b>KCMC Microbiologist</b><br/> <b>KCMC Pharmacists</b><br/> 9 – 5pm<br/> Pocket Quality Improvement training day (Room 1) Cobalt</p> <p>Collection of per diem daily living allowance</p> | TBC                           | TBC                         | Bank Holiday Monday         | <p>9:30-11:30<br/> <b>KCMC Microbiologist</b><br/> <b>KCMC Pharmacists</b><br/> Bone infection ward round WGH</p> <p>14:00 – 17:00<br/> <b>KCMC Microbiologist</b><br/> <b>KCMC Pharmacists</b></p> <p>Tour of Pharmacy Aseptic Department WGH</p> | <p>9:00-9:30<br/> <b>KCMC Pharmacists</b><br/> C Diff MDT (Education centre) NTGH 10</p> <p>9:30-12:00<br/> Pharmacy speciality board (Room 14) NTGH</p> <p>11:00-12:00<br/> <b>KCMC Microbiologist</b></p> <p>Lab sensitivity NTGH</p> | <p><b>KCMC Medical Director</b><br/> <b>KCMC Microbiologist</b><br/> <b>KCMC Pharmacists</b></p> <p>10:00 – 15:00<br/> Healthcare Leadership Training Cobalt</p> |

Friday 31<sup>st</sup> May

14:30

Transport to  
Newcastle airport  
for return flight –  
departure time  
16:25

\* Northumbria Healthcare NHS Foundation Trust is an NHS foundation trust which provides hospital and community health services in North Tyneside and hospital, community health and adult social care services in Northumberland. It includes nine hospital sites. Two of which were included in the programme

- North Tyneside General Hospital (NTGH)
- Wansbeck General Hospital (WGH)
