# Supplementary material for: Practical Pharmacist-Led Interventions to Improve Antimicrobial Stewardship in Ghana, Tanzania, Uganda and Zambia
Source: Pharmacy (Basel). 2021 Jul 8;9(3):124. doi: 10.3390/pharmacy9030124 (PMC8293468; doi:10.3390/pharmacy9030124)
Supplement: Supplementary file 1 [file pharmacy-09-00124-s001.zip]

Archive with 4 entries (4 files):
- Supplementary material 1_Workplan based on the baseline GLOBAL-PPS study results at Ghana Police  Hospital.pdf
- Supplementary material 2_AntimicrobialTherapyinWounds.pdf
- Supplementary material 3_OBGY DrugList.pdf
- Supplementary material 4_KCMC Visit to UK_Skeleton programme 03.5.19.pdf
